# Supplementary material for: Room temperature curable zirconium silicate dielectric ink for electronic applications
Source: Royal Society of Chemistry journal article supplement (doi:10.1039/c5tc01388g), 2015-01-01
Supplement: c5tc01388g1.pdf [file c5tc01388g1.pdf]

## Supporting Information

### Room temperature curable zirconium silicate dielectric ink for electronic applications

*Jobin Varghese<sup>a,b</sup>, Merja Teirikangas<sup>a</sup>, Jarkko Puustinen<sup>a</sup>, Heli Jantunen<sup>a</sup> and Mailadil Thomas Sebastian<sup>a,b\*</sup>*

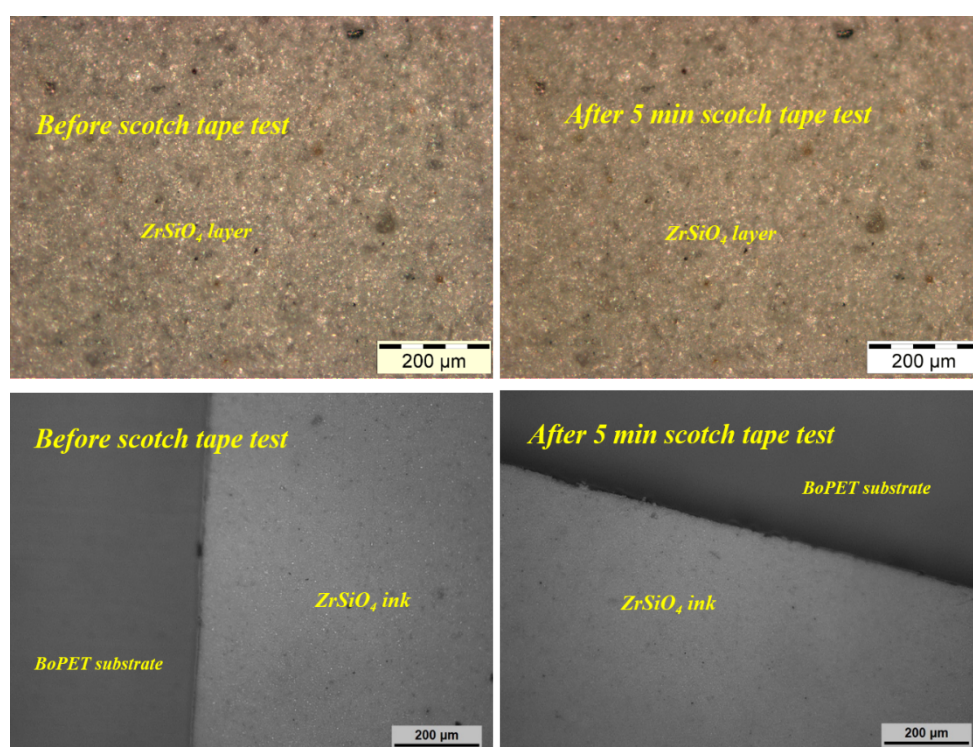

**Figure S1.** Optical microscopic images of surface and interface of ZrSiO<sub>4</sub> layer before and after scotch tape test analysis.
